# Supplementary material
Source: MDPI journal article supplement (https://www.mdpi.com/1424-8220/10/1/584)
Supplement: s1 [file s1]

*Note:*

The published date of this paper should be 13 January 2010, not 2009.
